# Supplementary material for: Linked genetic variants on chromosome 10 control ear morphology and body mass among dog breeds
Source: PubMed Central journal article supplement (PMC4477608; doi:10.1186/s12864-015-1702-2), 2015-06-23

a)

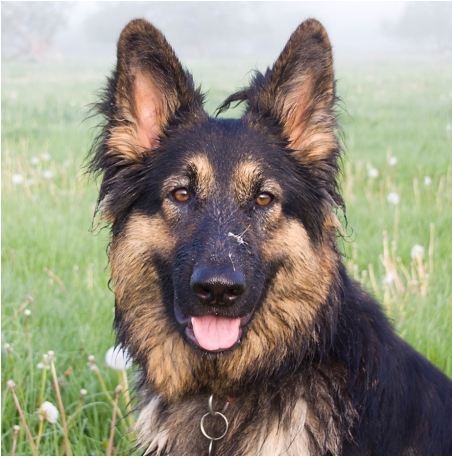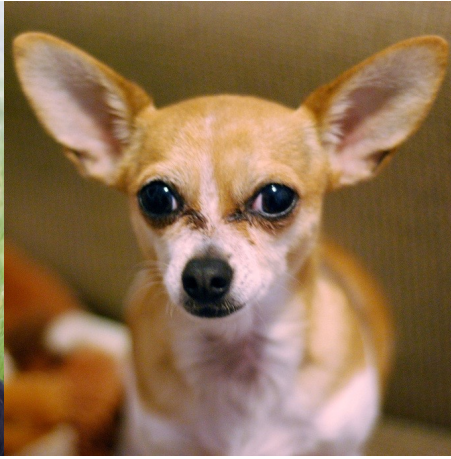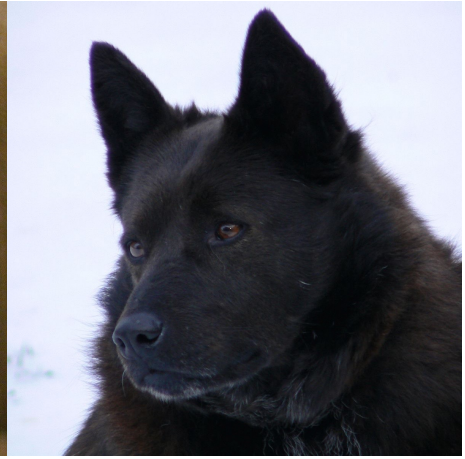

b)

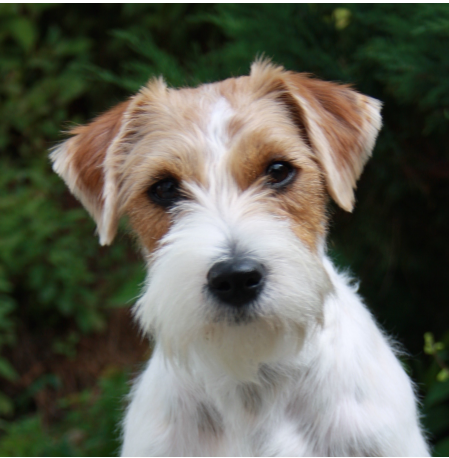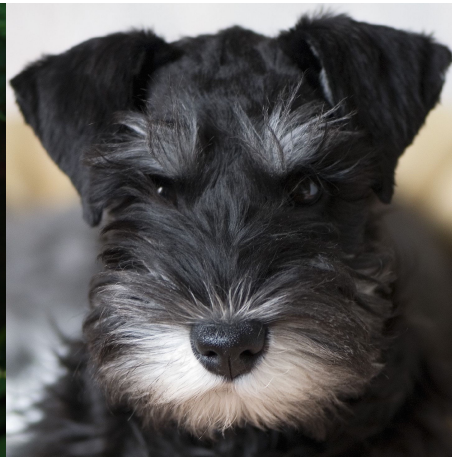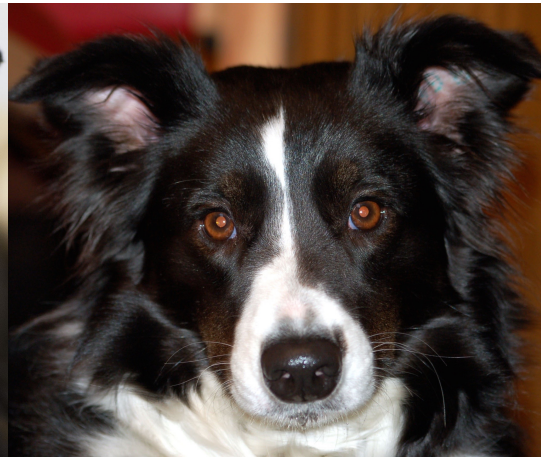

c)

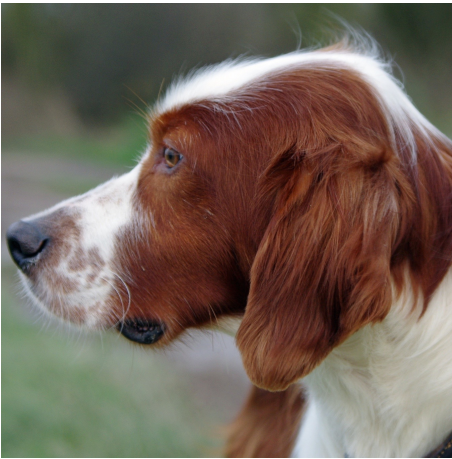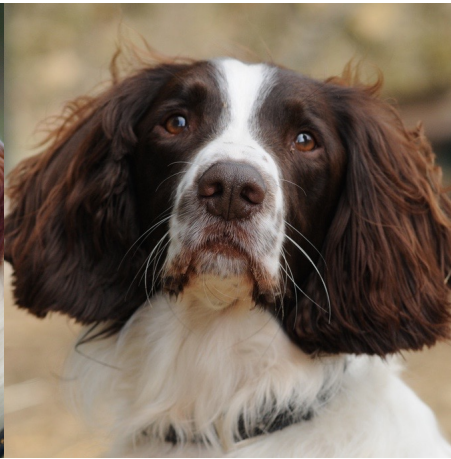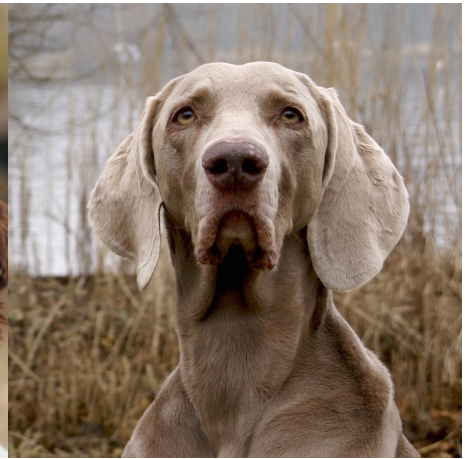

Supplement: 12864_2015_1702_MOESM12_ESM.pdf [file 12864_2015_1702_MOESM12_ESM.pdf]
